# Supplementary material for: Female Sex Is a Risk Factor Associated with Long-Term Post-COVID Related-Symptoms but Not with COVID-19 Symptoms: The LONG-COVID-EXP-CM Multicenter Study
Source: MDPI journal article supplement (doi:10.3390/jcm11020413), 2022-01-14
Supplement: s1 [file s1]

**Supplementary Table S1:** Adjusted odd ratio, 95% confidence interval, of baseline variables used in the multivariate analysis in post-COVID symptoms.

|                                 | Fatigue             | Dyspnea at rest    | Dyspnea exertion   | Pain Symptoms      | Hair Loss          | Ocular Problems    | ≥3 post-COVID symptoms |
|---------------------------------|---------------------|--------------------|--------------------|--------------------|--------------------|--------------------|------------------------|
| Age (years)                     | 1.003, 0.993-1.013  | 1.002, 0.992-1.012 | 1.003, 0.993-1.013 | 0.995, 0.988-1.002 | 0.978, 0.956-1.002 | 0.991, 0.971-1.011 | 1.000, 0.992-1.009     |
| Weight (kg)                     | 1.002, 0.990-1.014  | 0.998, 0.984-1.011 | 1.002, 0.990-1.013 | 1.010, 0.997-1.024 | 1.003, 0.990-1.017 | 1.010, 0.990-1.031 | 1.001, 0.990-1.012     |
| Height (cm)                     | 0.993, 0.973-1.013  | 0.981, 0.957-1.006 | 0.992, 0.973-1.012 | 0.992, 0.978-1.005 | 1.004, 0.982-1.026 | 0.997, 0.963-1.032 | 1.000, 0.982-1.019     |
| Obesity (pre-existing)          | 2.038, 0.548-7.581  | 3.321, 0.565-19.52 | 3.059, 0.783-11.94 | 2.478, 0.631-9.726 | 0.459, 0.096-2.200 | 1.743, 0.337-9.201 | 1.996, 0.500-7.967     |
| Hypertension (pre-existing)     | 2.084, 0.686-6.334  | 2.052, 0.435-9.681 | 2.295, 0.732-7.196 | 1.996, 0.626-6.365 | 1.060, 0.371-3.029 | 1.156, 0.208-6.425 | 1.616, 0.492-5.312     |
| Diabetes (pre-existing)         | 1.926, 0.609-6.086  | 2.114, 0.423-10.55 | 1.653, 0.518-5.270 | 1.404, 0.455-4.336 | 0.566, 0.142-2.247 | 0.467, 0.078-2.800 | 0.848, 0.276-2.600     |
| Asthma (pre-existing)           | 3.321, 0.949-11.627 | 5.004, 0.954-26.25 | 5.899, 0.924-27.59 | 2.703, 0.761-9.607 | 0.784, 0.212-2.903 | 0.478, 0.070-3.258 | 2.353, 0.635-8.719     |
| COPD (pre-existing)             | 3.317, 0.857-12.835 | 4.171, 0.771-22.58 | 4.533, 0.950-17.87 | 2.372, 0.635-8.854 | 0.382, 0.072-2.024 | 0.923, 0.170-4.999 | 1.463, 0.396-5.405     |
| Musculoskeletal Pain (pre)      | 1.549, 1.119-2.145  | 1.144, 0.813-1.611 | 1.496, 1.094-2.047 | 1.553, 1.271-1.898 | 1.376, 0.951-1.992 | 1.411, 0.770-2.586 | 1.492, 1.067-2.085     |
| Cardiac diseases (pre-existing) | 2.255, 0.700-7.264  | 3.365, 0.658-17.22 | 3.189, 0.949-10.71 | 2.463, 0.725-8.365 | 1.020, 0.331-3.144 | 0.530, 0.075-3.770 | 1.714, 0.478-6.140     |
| Rheumatological diseases (pre)  | 4.846, 0.642-36.581 | 0.986, 0.239-4.068 | 0.974, 0.240-4.099 | 2.669, 0.510-13.96 | 0.679, 0.121-3.819 | 0.484, 0.066-3.524 | 0.845, 0.203-3.511     |
| Other diseases (pre-existing)   | 2.045, 0.650-6.434  | 2.572, 0.528-12.53 | 2.464, 0.727-8.024 | 2.052, 0.625-6.738 | 1.113, 0.363-3.412 | 0.381, 0.020-7.117 | 2.509, 0.712-8.833     |
| Number symptoms at admission    | 4.095, 0.605-27.713 | 1.361, 0.420-3.138 | 1.374, 0.337-5.602 | 2.339, 0.528-10.36 | 7.560, 1.379-41.45 | 1.017, 0.259-3.990 | 3.199, 0.684-14.96     |
| Fever (COVID-19 onset)          | 0.364, 0.053-2.505  | 5.631, 0.569-55.76 | 1.050, 0.279-3.952 | 0.486, 0.109-2.175 | 0.163, 0.029-0.922 | 0.867, 0.506-1.486 | 0.457, 0.098-2.144     |
| Dyspnea (COVID-19 onset)        | 0.507, 0.075-3.411  | 4.183, 0.430-40.67 | 1.544, 0.358-6.660 | 0.680, 0.163-2.844 | 0.216, 0.039-1.194 | 1.073, 0.535-2.150 | 0.629, 0.141-2.809     |
| Myalgias (COVID-19 onset)       | 0.341, 0.049-2.373  | 2.423, 0.263-22.29 | 0.944, 0.267-3.335 | 0.780, 0.191-3.188 | 0.176, 0.032-1.001 | 1.618, 0.691-3.788 | 0.456, 0.097-2.132     |
| Cough (COVID-19 onset)          | 0.278, 0.040-1.939  | 3.189, 0.345-29.48 | 0.852, 0.218-3.328 | 0.529, 0.119-2.353 | 0.158, 0.28-0.877  | 1.310, 0.556-3.034 | 0.625, 0.090-2.004     |
| Headache (COVID-19 onset)       | 0.384, 0.054-2.722  | 2.858, 0.297-27.49 | 1.101, 0.277-4.385 | 0.934, 0.261-3.346 | 0.273, 0.050-1.506 | 1.724, 0.709-4.191 | 0.600, 0.127-2.841     |
| Diarrhea (COVID-19 onset)       | 0.284, 0.039-2.084  | 3.087, 0.316-30.13 | 0.843, 0.201-3.533 | 0.681, 0.153-3.039 | 0.257, 0.044-1.486 | 1.661, 0.616-4.482 | 0.641, 0.135-3.051     |
| Anosmia (COVID-19 onset)        | 0.296, 0.041-2.143  | 1.543, 0.164-14.51 | 0.904, 0.242-3.378 | 0.426, 0.090-2.018 | 0.174, 0.029-1.063 | 1.389, 0.455-4.236 | 0.284, 0.055-1.468     |
| Ageusia (COVID-19 onset)        | 0.423, 0.056-3.188  | 2.648, 0.255-27.53 | 0.862, 0.217-3.424 | 0.585, 0.123-2.777 | 0.193, 0.032-1.176 | 1.387, 0.423-4.547 | 0.847, 0.200-3.585     |
| Throat pain (COVID-19 onset)    | 0.372, 0.048-2.882  | 2.584, 0.252-26.44 | 0.822, 0.183-3.687 | 0.864, 0.199-3.746 | 0.304, 0.050-1.846 | 1.673, 0.478-5.857 | 0.742, 0.158-3.477     |
| Vomiting (COVID-19 onset)       | 0.404, 0.049-3.359  | 3.659, 0.319-42.03 | 0.920, 0.282-2.996 | 0.556, 0.109-2.849 | 0.176, 0.026-1.210 | 2.106, 0.458-9.672 | 0.517, 0.095-2.811     |
| Dizziness (COVID-19 onset)      | 0.276, 0.034-2.244  | 1.995, 0.197-20.17 | 0.755, 0.164-3.468 | 0.679, 0.140-3.280 | 0.218, 0.033-1.428 | 1.197, 0.292-4.912 | 0.542, 0.102-2.884     |
| Days at hospital                | 1.004, 0.991-1.017  | 1.018, 0.999-1.030 | 1.014, 0.999-1.028 | 1.012, 0.998-1.026 | 1.022, 0.999-1.039 | 1.011, 0.987-1.037 | 1.016, 0.999-1.030     |
| ICU admission                   | 0.904, 0.500-1.636  | 1.433, 0.736-2.787 | 0.853, 0.466-1.562 | 1.482, 0.791-2.776 | 1.027, 0.579-1.821 | 0.601, 0.158-2.276 | 1.169, 0.625-2.187     |

**Supplementary Table S2:** Adjusted odd ratio, 95% confidence interval, of baseline variables used in the multivariate analysis for depressive levels and poor sleep quality.

|                                 | <b>Depression (HADS-D<math>\geq</math>10 points)</b> | <b>Poor Sleep Quality (PSQI <math>\geq</math> 8 points)</b> |
|---------------------------------|------------------------------------------------------|-------------------------------------------------------------|
| Age (years)                     | 1.004, 0.991-1.016                                   | 1.003, 0.993-1.014                                          |
| Weight (kg)                     | 1.007, 0.992-1.022                                   | 1.006, 0.993-1.019                                          |
| Height (cm)                     | 0.979, 0.952-1.006                                   | 0.985, 0.963-1.007                                          |
| Obesity (pre-existing)          | 0.551, 0.109-2.780                                   | 1.107, 0.357-3.434                                          |
| Hypertension (pre-existing)     | 1.131, 0.328-3.900                                   | 0.915, 0.353-2.373                                          |
| Diabetes (pre-existing)         | 1.184, 0.356-3.939                                   | 0.726, 0.247-2.133                                          |
| Asthma (pre-existing)           | 1.227, 0.342-4.404                                   | 1.416, 0.436-4.598                                          |
| COPD (pre-existing)             | 1.039, 0.324-3.331                                   | 0.707, 0.211-2.366                                          |
| Musculoskeletal Pain (pre)      | 0.984, 0.765-1.265                                   | 1.519, 1.098-2.102                                          |
| Cardiac diseases (pre-existing) | 0.872, 0.238-3.193                                   | 1.189, 0.397-3.564                                          |
| Rheumatological diseases (pre)  | 0.739, 0.129-4.238                                   | 0.628, 0.131-3.017                                          |
| Other diseases (pre-existing)   | 1.478, 0.381-5.734                                   | 1.195, 0.415-3.438                                          |
| Number symptoms at admission    | 6.041, 1.254-29.098                                  | 0.966, 0.292-3.197                                          |
| Fever (COVID-19 onset)          | 0.269, 0.054-1.327                                   | 0.995, 0.344-2.883                                          |
| Dyspnea (COVID-19 onset)        | 0.279, 0.057-1.361                                   | 1.465, 0.354-6.060                                          |
| Myalgias (COVID-19 onset)       | 0.215, 0.044-1.050                                   | 1.332, 0.300-5.919                                          |
| Cough (COVID-19 onset)          | 0.154, 0.031-0.773                                   | 1.115, 0.306-4.065                                          |
| Headache (COVID-19 onset)       | 0.185, 0.036-1.005                                   | 1.397, 0.300-6.504                                          |
| Diarrhea (COVID-19 onset)       | 0.207, 0.039-1.097                                   | 1.374, 0.309-6.099                                          |
| Anosmia (COVID-19 onset)        | 0.226, 0.042-1.210                                   | 1.155, 0.270-4.942                                          |
| Ageusia (COVID-19 onset)        | 0.248, 0.046-1.339                                   | 1.628, 0.355-7.914                                          |
| Throat pain (COVID-19 onset)    | 0.139, 0.023-0.831                                   | 1.871, 0.367-9.537                                          |
| Vomiting (COVID-19 onset)       | 0.160, 0.023-1.131                                   | 1.388, 0.275-7.009                                          |
| Dizziness (COVID-19 onset)      | 0.147, 0.023-1.001                                   | 1.679, 0.322-8.768                                          |
| Days at hospital                | 1.017, 0.999-1.030                                   | 1.022, 1.007-1.038                                          |
| ICU admission                   | 1.820, 0.917-3.612                                   | 1.407, 0.751-2.633                                          |
